# Supplementary material
Source: MDPI journal article supplement (https://www.mdpi.com/2071-1050/12/2/697)
Supplement: s1 [file s1]

# Supplementary materials:

## Cost benefits analysis of municipal solid waste incineration in Chinese provinces

Shitong Yu and Huijuan Dong \*

School of Environmental Science and Engineering, Shanghai Jiao Tong University, Shanghai 200240, China

**Table S1.** Annual amount of MSW incineration in 31 Chinese provinces.

|                | Annual amount of MSW incineration(t) |
|----------------|--------------------------------------|
| Beijing        | 3.27E+06                             |
| Tianjin        | 1.38E+06                             |
| Shanghai       | 3.61E+06                             |
| Chongqing      | 2.14E+06                             |
| Hebei          | 2.85E+06                             |
| Shanxi         | 1.15E+06                             |
| Inner Mongolia | 6.15E+05                             |
| Liaoning       | 6.55E+05                             |
| Jilin          | 1.62E+06                             |
| Heilongjiang   | 1.00E+06                             |
| Jiangsu        | 1.29E+07                             |
| Zhejiang       | 8.24E+06                             |
| Anhui          | 3.35E+06                             |
| Fujian         | 4.87E+06                             |
| Jiangxi        | 5.35E+05                             |
| Shandong       | 8.97E+06                             |
| Henan          | 1.59E+06                             |
| Hubei          | 3.93E+06                             |
| Hunan          | 1.26E+06                             |
| Guangdong      | 9.11E+06                             |
| Guangxi        | 1.24E+06                             |
| Hainan         | 1.47E+06                             |
| Sichuan        | 4.57E+06                             |
| Guizhou        | 7.14E+05                             |
| Yunnan         | 2.26E+06                             |
| Tibet          | 1.00E+04                             |
| Shaanxi        | 0                                    |
| Gansu          | 8.85E+05                             |
| Qinghai        | 0                                    |
| Ningxia        | 3.46E+05                             |
| Xinjiang       | 1.48E+05                             |

**Table S2.** MSW composition in 31 Chinese provinces.

|           | Kitchen waste | Paper  | Plastic and Rubber | Textile | Wood bamboo | Glass | Metal | Lime soil |
|-----------|---------------|--------|--------------------|---------|-------------|-------|-------|-----------|
| Beijing   | 56.84%        | 18.33% | 18.77%             | 1.00%   | 0.61%       | 0.75% | 0.56% | 1.67%     |
| Tianjin   | 56.9%         | 15.3%  | 16.90%             | 3.90%   | 1.60%       | 1.60% | 0.70% | 2.90%     |
| Shanghai  | 60.40%        | 11.88% | 17.56%             | 2.85%   | 1.95%       | 3.57% | 1.08% | 0.02%     |
| Chongqing | 59.20%        | 10.10% | 16.00%             | 6.10%   | 4.20%       | 3.40% | 1.10% | 0         |

|                |        |        |        |        |        |       |       |        |
|----------------|--------|--------|--------|--------|--------|-------|-------|--------|
| Hebei          | 62.71% | 3.07%  | 5.97%  | 1.61%  | 0.97%  | 0.73% | 0.48% | 19.05% |
| Shanxi         | 45.45% | 9.97%  | 18.24% | 2.26%  | 1.30%  | 2.63% | 0.54% | 17.81% |
| Inner Mongolia | 32.00% | 6.50%  | 9.20%  | 0.30%  | 0.40%  | 1.15% | 0.50% | 15.90% |
| Liaoning       | 60.40% | 7.90%  | 12.90% | 3.60%  | 2.50%  | 5.40% | 2.10% | 5.30%  |
| Jilin          | 43.00% | 4.90%  | 15.00% | 2.70%  | 2.70%  | 2.60% | 0.50% | 4.60%  |
| Heilongjiang   | 44.80% | 13.40% | 3.30%  | 4.70%  | 0      | 6.60% | 2.70% | 24.50% |
| Jiangsu        | 66.00% | 9.00%  | 12.00% | 1.00%  | 0      | 9.00% | 1.00% | 1.00%  |
| Zhejiang       | 64.50% | 6.70%  | 10.10% | 1.20%  | 0.10%  | 2.00% | 0.30% | 15.10% |
| Anhui          | 61.50% | 1.90%  | 11.40% | 2.10%  | 0.90%  | 0.60% | 0     | 21.70% |
| Fujian         | 54.90% | 13.73% | 13.26% | 3.11%  | 0.26%  | 2.05% | 0.13% | 3.34%  |
| Jiangxi        | 62.50% | 5.50%  | 6.00%  | 3.00%  | 3.00%  | 5.50% | 3.00% | 20.50% |
| Shandong       | 58.70% | 11.20% | 9.90%  | 3.00%  | 1.00%  | 1.30% | 0.30% | 14.60% |
| Henan          | 55.02% | 5.52%  | 3.97%  | 1.65%  | 1.36%  | 1.56% | 0.59% | 26.67% |
| Hubei          | 55.30% | 1.50%  | 4.50%  | 0      | 8.30%  | 2.00% | 1.10% | 27.30% |
| Hunan          | 47.53% | 0.88%  | 14.07% | 7.28%  | 3.57%  | 0.23% | 1.17% | 9.51%  |
| Guangdong      | 53.40% | 8.30%  | 18.60% | 10.00% | 1.70%  | 1.40% | 0.40% | 6.20%  |
| Guangxi        | 58.93% | 10.74% | 10.82% | 2.12%  | 0.56%  | 4.33% | 0.40% | 4.04%  |
| Hainan         | 58.42% | 6.44%  | 11.93% | 0.89%  | 1.60%  | 0.53% | 0.68% | 12.92% |
| Sichuan        | 64.29% | 11.71% | 7.45%  | 1.08%  | 1.40%  | 2.80% | 0.76% | 7.13%  |
| Guizhou        | 41.46% | 13.07% | 14.97% | 4.42%  | 2.36%  | 1.87% | 0.72% | 21.13% |
| Yunnan         | 60.59% | 9.69%  | 9.99%  | 1.70%  | 1.21%  | 1.70% | 0.46% | 8.03%  |
| Tibet          | 57.00% | 6.00%  | 12.00% | 7.00%  | 14.00% | 0     | 1.00% | 3.00%  |
| Shaanxi        | 38.60% | 9.30%  | 10.10% | 1.40%  | 7.40%  | 6.50% | 3.40% | 23.30% |
| Gansu          | 36.38% | 9.70%  | 11.34% | 2.10%  | 1.36%  | 0.93% | 0.23% | 37.81% |
| Qinghai        | 51.93% | 6.85%  | 9.41%  | 2.72%  | 1.75%  | 2.89% | 1.21% | 27.22% |
| Ningxia        | 35.70% | 2.10%  | 4.10%  | 1.20%  | 1.70%  | 0.40% | 0.20% | 45.70% |
| Xinjiang       | 76.00% | 2.40%  | 5.40%  | 4.20%  | 2.50%  | 2.40% | 0.80% | 6.40%  |

Table S3. Power generation structure of 31 Chinese provinces.

|                | Thermal power generation | Wind power generation | Solar power generation | Nuclear power generation | Hydropower generation |
|----------------|--------------------------|-----------------------|------------------------|--------------------------|-----------------------|
| Beijing        | 96.17%                   | 0.75%                 | 0.25%                  | /                        | 2.83%                 |
| Tianjin        | 99.02%                   | 0.95%                 | 0.03%                  | /                        | 0.00%                 |
| Shanghai       | 99.11%                   | 0.83%                 | 0.06%                  | /                        | 0.00%                 |
| Chongqing      | 64.09%                   | 0.66%                 | 0.00%                  | /                        | 35.25%                |
| Hebei          | 90.19%                   | 7.96%                 | 1.01%                  | /                        | 0.85%                 |
| Shanxi         | 93.21%                   | 4.74%                 | 0.57%                  | /                        | 1.48%                 |
| Inner Mongolia | 85.44%                   | 11.75%                | 2.11%                  | /                        | 0.70%                 |
| Liaoning       | 78.68%                   | 7.25%                 | 0.19%                  | 11.23%                   | 2.64%                 |
| Jilin          | 77.90%                   | 11.14%                | 0.12%                  | /                        | 10.84%                |
| Heilongjiang   | 89.23%                   | 8.84%                 | 0.05%                  | /                        | 1.87%                 |
| Jiangsu        | 93.49%                   | 2.00%                 | 0.87%                  | 3.26%                    | 0.37%                 |
| Zhejiang       | 74.24%                   | 0.73%                 | 0.69%                  | 15.75%                   | 8.58%                 |
| Anhui          | 94.76%                   | 1.52%                 | 0.92%                  | /                        | 2.80%                 |
| Fujian         | 44.84%                   | 2.50%                 | 0.17%                  | 20.38%                   | 32.10%                |
| Jiangxi        | 78.95%                   | 1.73%                 | 1.03%                  | /                        | 18.29%                |
| Shandong       | 96.50%                   | 2.67%                 | 0.56%                  | /                        | 0.26%                 |
| Henan          | 95.23%                   | 0.68%                 | 0.49%                  | /                        | 3.60%                 |
| Hubei          | 41.00%                   | 1.63%                 | 0.46%                  | /                        | 56.91%                |

|           |        |        |        |        |        |
|-----------|--------|--------|--------|--------|--------|
| Hunan     | 52.22% | 2.86%  | 0.05%  | /      | 44.87% |
| Guangdong | 69.70% | 1.11%  | 0.10%  | 16.50% | 12.59% |
| Guangxi   | 42.67% | 1.03%  | 0.06%  | 7.65%  | 48.60% |
| Hainan    | 69.49% | 2.23%  | 0.74%  | 20.89% | 6.65%  |
| Sichuan   | 12.15% | 0.55%  | 0.19%  | /      | 87.12% |
| Guizhou   | 58.52% | 2.90%  | 0.05%  | /      | 38.54% |
| Yunnan    | 8.84%  | 5.77%  | 0.78%  | /      | 84.61% |
| Tibet     | 3.40%  | 0.00%  | 5.39%  | /      | 91.21% |
| Shaanxi   | 89.99% | 2.13%  | 0.76%  | /      | 7.12%  |
| Gansu     | 57.99% | 11.24% | 4.96%  | /      | 25.82% |
| Qinghai   | 27.52% | 1.81%  | 16.26% | /      | 54.41% |
| Ningxia   | 83.32% | 10.96% | 4.49%  | /      | 1.23%  |
| Xinjiang  | 81.62% | 7.23%  | 2.89%  | /      | 8.27%  |

Note: The data source is (China Energy Statistics Yearbook, 2016).

**Table S4.** Life cycle inventory of MSW incineration.

|                     | Amount                 | Unit |
|---------------------|------------------------|------|
| <b>Model input</b>  |                        |      |
| <b>Energy</b>       |                        |      |
| electricity         | 146.4                  | kW.h |
| diesel              | 0.1370                 | Kg   |
| fossil fuel         | 34.40                  | MJ   |
| <b>Raw Material</b> |                        |      |
| Activated carbon    | 0.5000                 | Kg   |
| Ammonia water       | 2.400                  | Kg   |
| CaCO <sub>3</sub>   | 7.100                  | kg   |
| FeCl <sub>3</sub>   | 0.06000                | Kg   |
| NaOH                | 0.4000                 | Kg   |
| Sand                | 0.2000                 | T    |
| Aggregate           | 0.2800                 | T    |
| Cement              | 0.02000                | T    |
| Water               | 202.8                  | Kg   |
| <b>Model output</b> |                        |      |
| <b>Waste</b>        |                        |      |
| slag                | 200.0                  | Kg   |
| Fly ash             | 20.00                  | Kg   |
| Leachate            | 250.0                  | Kg   |
| <b>Emissions</b>    |                        |      |
| Particulate         | 5.430                  | G    |
| CO <sub>2</sub>     | 257.8 kg               | G    |
| SO <sub>2</sub>     | 48.25                  | G    |
| CO                  | 95.58                  | G    |
| HCl                 | 8.357                  | G    |
| NO <sub>x</sub>     | 411.9                  | G    |
| Dioxins             | 3.300×10 <sup>-9</sup> | G    |

**Table S5.** LCC of MSW incineration and landfill.

|                 | Incineration (RMB/tMSW) | Landfill (RMB/tMSW) |
|-----------------|-------------------------|---------------------|
| Investment cost | 66.21                   | 182.80              |
| Operating cost  |                         |                     |
| Material cost   | 11.74                   | 5.58                |

|                     |                                                |       |
|---------------------|------------------------------------------------|-------|
| Maintenance cost    | 15.89                                          | 20.47 |
| Labor cost          | 14.95                                          | 25.77 |
| Energy cost         | 64.41                                          | 6.67  |
| Depreciation cost   | 59.59                                          | 76.77 |
| Waste disposal cost |                                                |       |
| Leachate disposal   | 9.93                                           | 20.38 |
| Slag disposal       | 7.5                                            | /     |
| Fly ash disposal    | 18                                             | /     |
| Benefits            | Different prices depending on local conditions | /     |
